# Supplementary material for: Facile strain analysis of largely bending films by a surface-labelled grating method
Source: Sci Rep. 2014 Jun 20;4:5377. doi: 10.1038/srep05377 (PMC4064356; doi:10.1038/srep05377)
Supplement: Supplementary Information [file srep05377-s1.pdf]

## SUPPLEMENTRY INFORMATION

# Facile strain analysis of largely bending films by a surface-labelled grating method

Norihisa Akamatsu<sup>1</sup>, Wataru Tashiro<sup>1</sup>, Keisuke Saito<sup>1</sup>, Jun-ichi Mamiya<sup>1</sup>, Motoi Kinoshita<sup>2</sup>, Tomiki Ikeda<sup>1,3</sup>, Jun Takeya<sup>4</sup>, Shigenori Fujikawa<sup>5</sup>, Arri Priimagi<sup>1,6</sup> and Atsushi Shishido<sup>1\*</sup>

<sup>1</sup> Chemical Resources Laboratory, Tokyo Institute of Technology, R1-12, 4259 Nagatsuta, Midori-ku, Yokohama 226-8503, Japan

<sup>2</sup> Present address: Saitama Institute of Technology, 1690 Fusaiji, Fukaya, Saitama 369-0293, Japan

<sup>3</sup> Present address: Chuo University, 1-13-27 Kasuga, Bunkyo-ku, Tokyo 112-8551, Japan

<sup>4</sup> GSFS, The University of Tokyo, 5-1-5 Kashiwanoha, Kashiwa-shi, Chiba 277-8561, Japan

<sup>5</sup> International Institute for Carbon-Neutral Energy Research (WPI-I2CNER), Kyushu University, 744 Motoooka, Nishi-ku, Fukuoka 819-0395, Japan

<sup>6</sup> Department of Applied Physics, Aalto University, P.O. Box 13500, FI-00076 Aalto, Finland

E-mail: ashishid@res.titech.ac.jp

## Preparation of azobenzene-containing liquid-crystalline elastomer films.

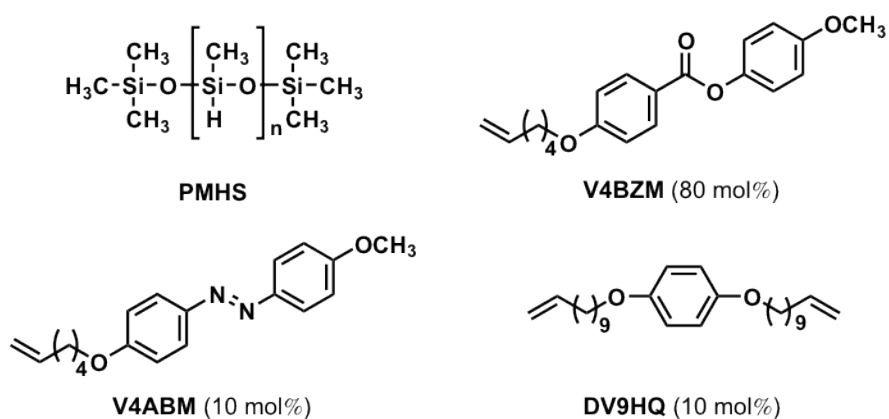

**Figure S1. Chemical structures of compounds used in this study.**

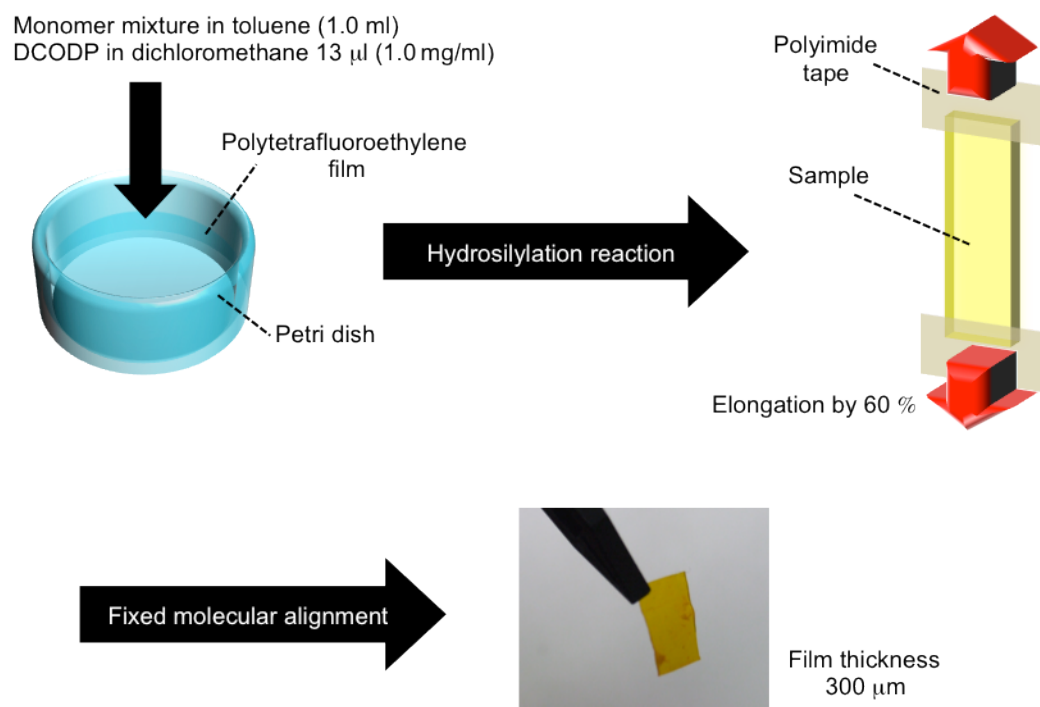

**Figure S2. Preparation of azobenzene-containing liquid-crystalline elastomer films by a two-step method.**

## Evaluation of the molecular alignment.

**Figure S3a** shows the polarized optical micrographs of azobenzene-containing liquid-crystalline elastomer films. Bright and dark images were subsequently observed when the film was imaged between crossed polarizers and rotated by  $45^\circ$ . The homogeneous molecular alignment was further confirmed by polarized UV-Vis absorption spectroscopy (**Fig. S3b**), from which we deduced that the side chains are preferentially aligned along the elongation direction, with an order parameter of 0.51.

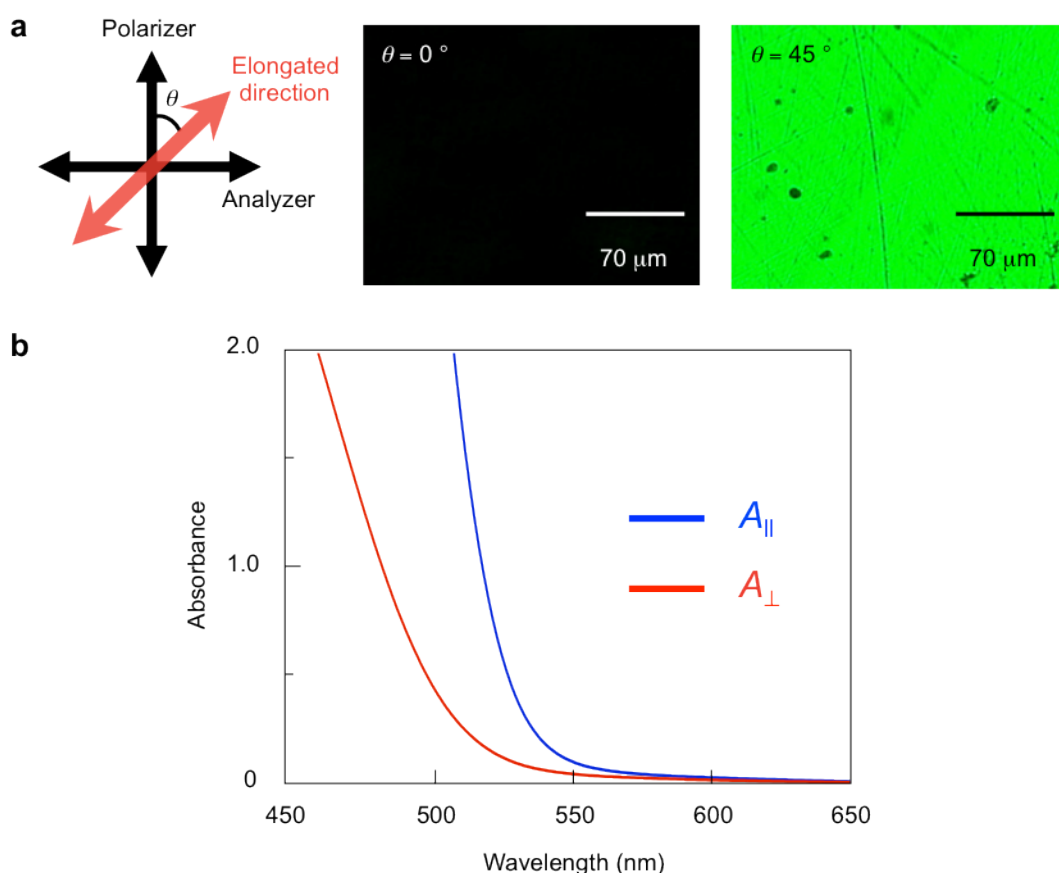

**Figure S3. Evaluation of the molecular alignment in the film.** **a**, Polarized optical micrographs of azobenzene-containing liquid-crystalline elastomer films after elongation. **b**, Polarized absorption spectra after the elongation.  $A_{\parallel}$  and  $A_{\perp}$  denote the absorption parallel and perpendicular to the elongated direction, respectively. The film thickness was  $300\ \mu\text{m}$ .

## Recording of gratings on surface of the films.

We recorded gratings by trans-cis photoisomerization of azobenzene and the resultant order-disorder change in the molecular alignment upon UV irradiation. The unidirectionally-aligned azobenzene-containing liquid-crystalline elastomer films were labelled with a grating using a photomask with 4  $\mu\text{m}$  grating period. The grating vector of the photomask was set parallel to the molecular alignment direction of the films, and a periodic structure was recorded only in the surface region of the films by irradiation with UV light through a photomask for 5 min. The depth of the periodic structure was confirmed by polarized optical micrograph to be 25  $\mu\text{m}$  (**Fig. S4**). The radiation wavelength and intensity were 366 nm and 10 mW/cm<sup>2</sup>, respectively.

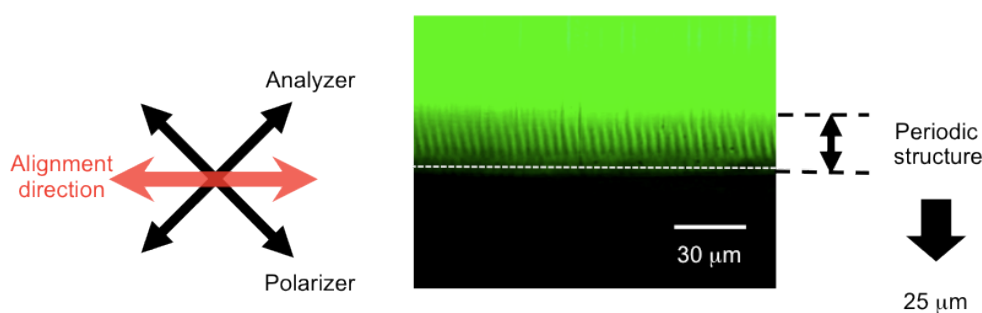

**Figure S4. Polarized optical micrograph of the cross-section of the film after the grating formation.**

a

| Probe spot | Inner surface (%) |      | Outer surface (%) |   |
|------------|-------------------|------|-------------------|---|
|            | x                 | y    | x                 | y |
| 4          | -4.2              | +0.8 | +2.7              | - |
| 5          | -7.2              | +1.2 | +3.8              | - |
| 6          | -4.5              | +1.0 | +2.3              | - |

b

| Probe spot | Inner surface (%) |      | Outer surface (%) |      |
|------------|-------------------|------|-------------------|------|
|            | x                 | y    | x                 | y    |
| 4          | -5.4              | +2.2 | -3.2              | +0.9 |
| 5          | -7.2              | +2.9 | -3.2              | +1.1 |
| 6          | -5.6              | +2.1 | -2.9              | +0.9 |

**Figure S5. Surface strains of the three spots of a, mechanically-bent and b, photochemically-bent films.**

## Preparation of PDMS single layer and bilayer films.

**Figure S6** shows a method for manufacturing a bilayer film. For single-layer films, the glass cell was set with 500  $\mu\text{m}$  thick spacers between the glass substrate and a silicon substrate. The surface relief grating had 8  $\mu\text{m}$  periodicity which was prepared by photolithography. A mixture of Sylpot and catalyst (10:1 (w/w) for soft film and 5:1 (w/w) for hard film) was inserted into the cell by capillary force to bake for 2 h at 75  $^{\circ}\text{C}$ . A free-standing PDMS film was obtained by removing the film from the substrates. For bilayer films, a hard PDMS film with a 100  $\mu\text{m}$  thickness was first prepared by the above-mentioned method. After removal of the glass substrate, another glass substrate was set with the 500  $\mu\text{m}$  thick spacers, and a soft PDMS film was prepared on the hard PDMS film to result in a bilayer PDMS film with a total thickness of 500  $\mu\text{m}$ .

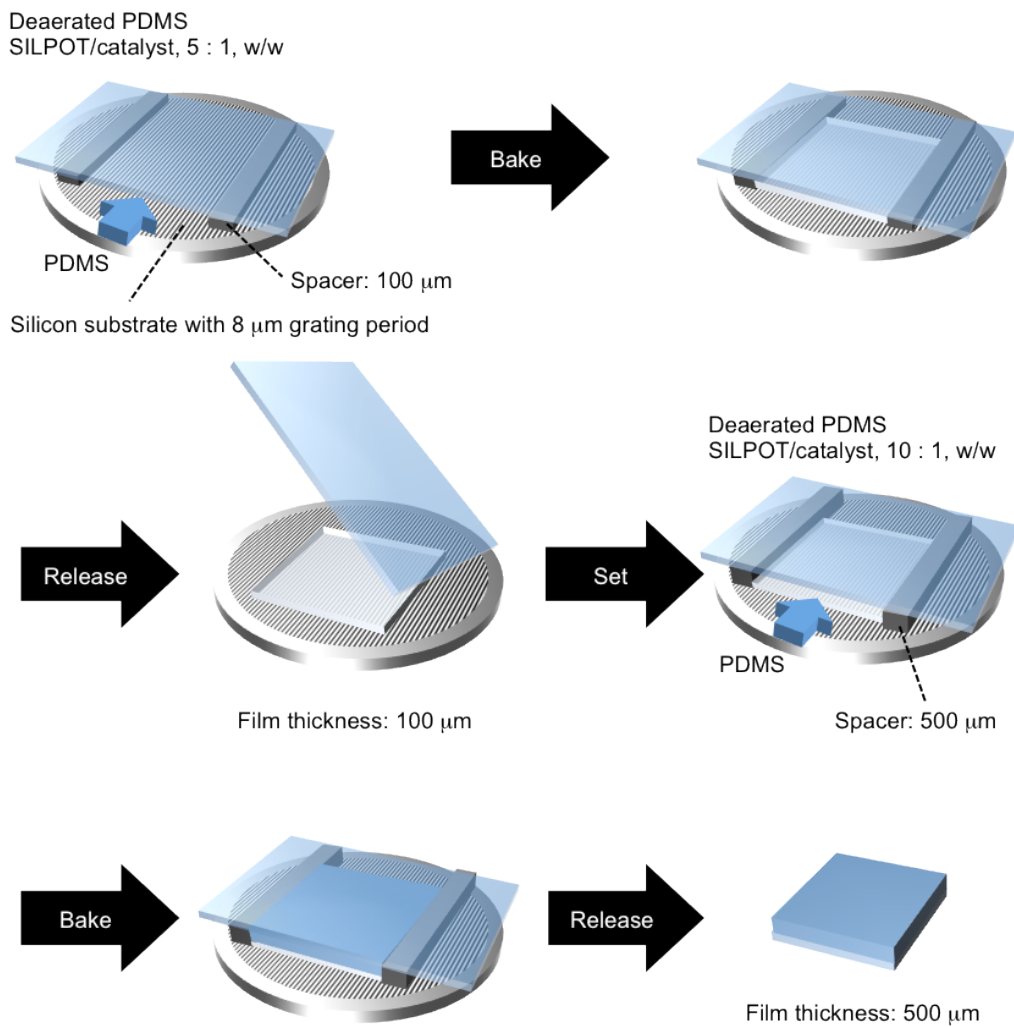

**Figure S6. Preparation of bilayer PDMS film.**

gS5

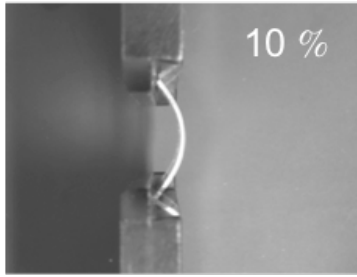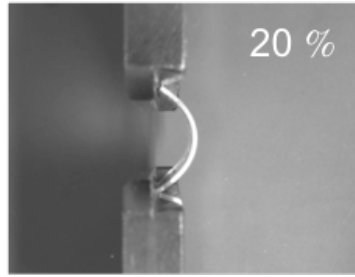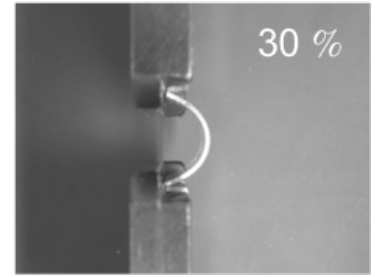

H1S4g

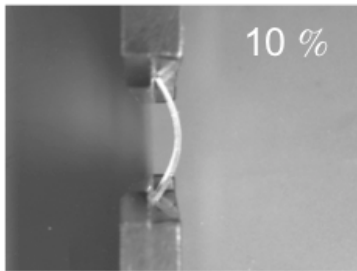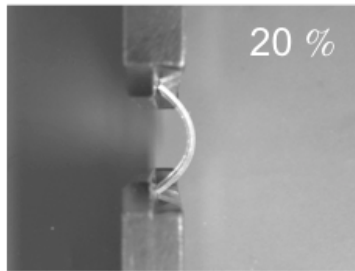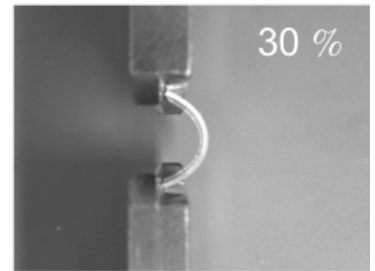

gH1S4

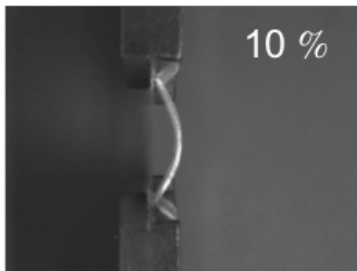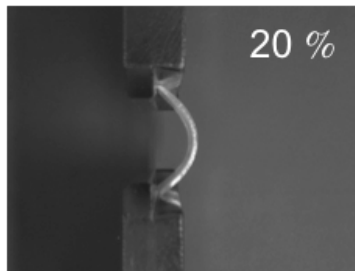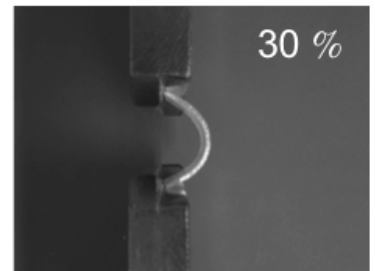

**Figure S7. Top-view of mechanically bent single-layer and bilayer PDMS films.**

**Surface strain analysis of poly(ethylene naphthalate) (PEN) film by means of the PDMS grating label.**

**Figure S8** shows surface strain measurements of PEN film by means of the soft single-layer PDMS grating label with a thickness of 100  $\mu\text{m}$ . The PDMS label is put on the surface of the PEN film so that the grating is attached with the PEN surface; this allows surface-specific strain evaluation (**Fig. S8a**). With bending of the film by a mechanical stress (**Fig. S8b**), the first-order diffraction angle of the probe beam shifted depending on the applied strain (**Fig. S8a, c**). The PDMS

labelling enables the surface strain analysis of various bending films.

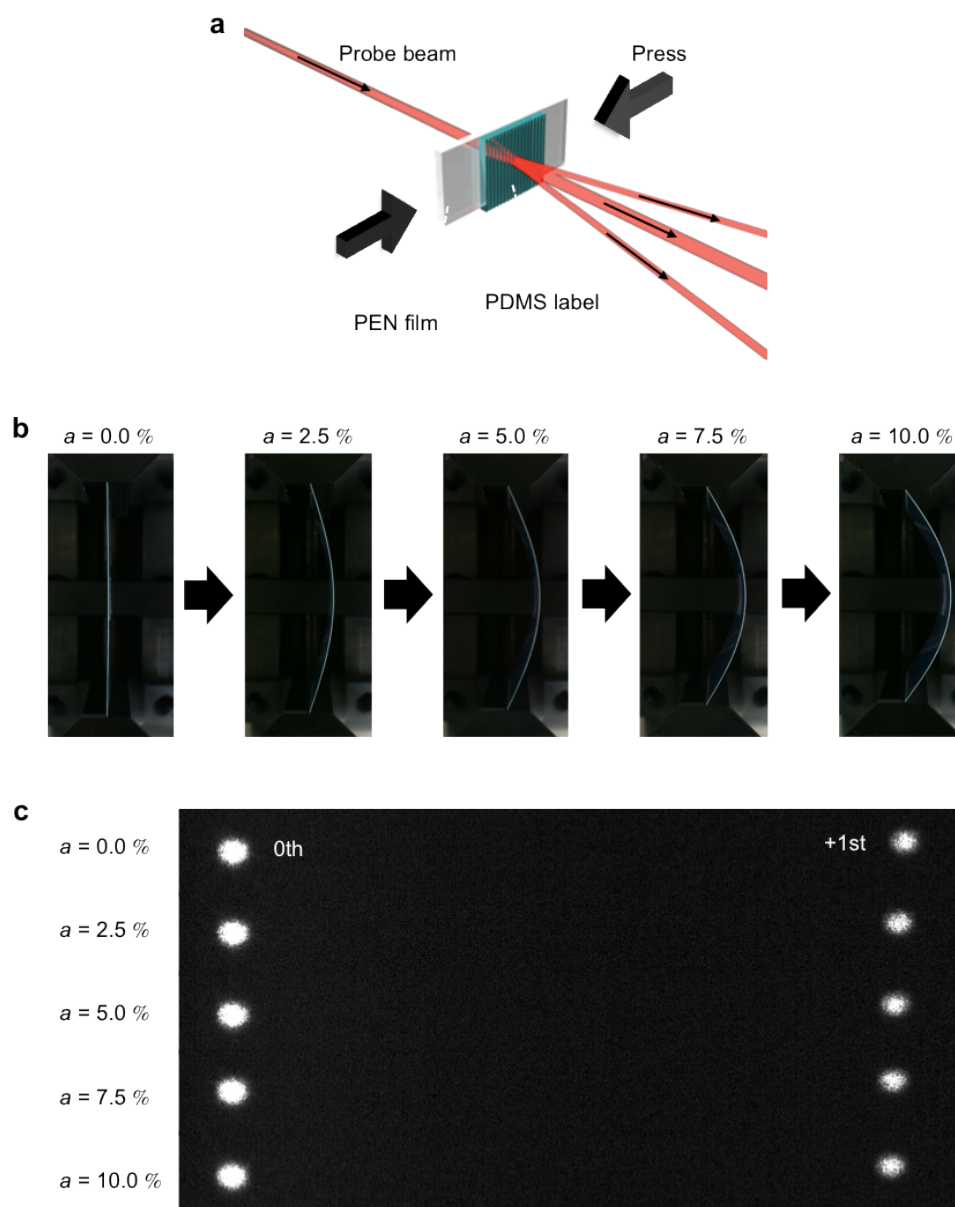

**Figure S8. Surface-strain analysis of PEN film by the surface-labelled gratings.**

1. Hogan, P. M., Tajbakhsh, A. R., Terentjev, E. M. uv manipulation of order and macroscopic shape in nematic elastomers. *Phys. Rev. E* **65**, 041720 (2002).
2. Küpfer, J., Finkelmann, H. *Makromol. Nematic liquid single crystal elastomers. Chem. Rapid Commun.* **12**, 717 - 726 (1991).
